# Supplementary material for: Subtype assignment of CLL based on B-cell subset associated gene signatures from normal bone marrow – A proof of concept study
Source: PubMed Central journal article supplement (PMC5841735; doi:10.1371/journal.pone.0193249), 2018-03-07
Supplement: pone.0193249.s002.pdf [file pone.0193249.s002.pdf]

**S1 Table.** Highly selected monoclonal antibody panel with which to immunophenotype bone marrow-derived B-cell subsets

|             | CD10 | CD19 | CD20 | CD27 | CD34 | CD38 | CD45 |
|-------------|------|------|------|------|------|------|------|
| Pre-BI      | ++   | +    | -    | -    | +    | ++   | -d   |
| Pre-BII     | +    | +    | het  | -    | -    | +    | +    |
| Immature    | +    | +    | +    | -    | -    | +    | +    |
| Naïve       | -    | +    | +    | -    | -    | -    | +    |
| Memory      | -    | +    | +    | +    | -    | -    | +    |
| Plasma cell | -    | het  | -    | ++   | -    | +++  | het  |

NOTE: Panel of differentiation marker combinations used to categorize B-cell subsets.

++ = strongly positive, + = positive, - = negative, -d = dimly positive, het = heterogenous.
