# Supplementary material for: Subtype assignment of CLL based on B-cell subset associated gene signatures from normal bone marrow – A proof of concept study
Source: PubMed Central journal article supplement (PMC5841735; doi:10.1371/journal.pone.0193249), 2018-03-07
Supplement: pone.0193249.s003.pdf [file pone.0193249.s003.pdf]

**S2 Table.** List of included CLL patients in the study.

| GEO_ID    | Study    | GSE_ID   | GEO_ID    | Study | GSE_ID   |
|-----------|----------|----------|-----------|-------|----------|
| GSM877692 | SAPIENZA | GSE69034 | GSM331287 | ROCHE | GSE39671 |
| GSM877693 | SAPIENZA | GSE69034 | GSM331288 | ROCHE | GSE39671 |
| GSM877694 | SAPIENZA | GSE69034 | GSM331289 | ROCHE | GSE39671 |
| GSM877695 | SAPIENZA | GSE69034 | GSM331290 | ROCHE | GSE39671 |
| GSM877696 | SAPIENZA | GSE69034 | GSM331291 | ROCHE | GSE39671 |
| GSM877697 | SAPIENZA | GSE69034 | GSM331292 | ROCHE | GSE39671 |
| GSM877698 | SAPIENZA | GSE69034 | GSM331293 | ROCHE | GSE39671 |
| GSM877699 | SAPIENZA | GSE69034 | GSM331294 | ROCHE | GSE39671 |
| GSM877700 | SAPIENZA | GSE69034 | GSM331295 | ROCHE | GSE39671 |
| GSM877701 | SAPIENZA | GSE69034 | GSM331296 | ROCHE | GSE39671 |
| GSM877702 | SAPIENZA | GSE69034 | GSM331298 | ROCHE | GSE39671 |
| GSM877703 | SAPIENZA | GSE69034 | GSM331300 | ROCHE | GSE39671 |
| GSM877704 | SAPIENZA | GSE69034 | GSM331301 | ROCHE | GSE39671 |
| GSM877705 | SAPIENZA | GSE69034 | GSM331302 | ROCHE | GSE39671 |
| GSM877706 | SAPIENZA | GSE69034 | GSM331304 | ROCHE | GSE39671 |
| GSM877707 | SAPIENZA | GSE69034 | GSM331305 | ROCHE | GSE39671 |
| GSM877708 | SAPIENZA | GSE69034 | GSM331306 | ROCHE | GSE39671 |
| GSM877709 | SAPIENZA | GSE69034 | GSM331307 | ROCHE | GSE39671 |
| GSM877710 | SAPIENZA | GSE69034 | GSM331309 | ROCHE | GSE39671 |
| GSM877711 | SAPIENZA | GSE69034 | GSM331312 | ROCHE | GSE39671 |
| GSM877712 | SAPIENZA | GSE69034 | GSM331313 | ROCHE | GSE39671 |
| GSM877713 | SAPIENZA | GSE69034 | GSM331314 | ROCHE | GSE39671 |
| GSM877714 | SAPIENZA | GSE69034 | GSM331315 | ROCHE | GSE39671 |
| GSM877715 | SAPIENZA | GSE69034 | GSM331316 | ROCHE | GSE39671 |
| GSM877716 | SAPIENZA | GSE69034 | GSM331317 | ROCHE | GSE39671 |
| GSM877717 | SAPIENZA | GSE69034 | GSM331320 | ROCHE | GSE39671 |
| GSM877718 | SAPIENZA | GSE69034 | GSM331321 | ROCHE | GSE39671 |
| GSM877719 | SAPIENZA | GSE69034 | GSM331322 | ROCHE | GSE39671 |
| GSM877720 | SAPIENZA | GSE69034 | GSM331327 | ROCHE | GSE39671 |
| GSM877721 | SAPIENZA | GSE69034 | GSM331328 | ROCHE | GSE39671 |
| GSM877722 | SAPIENZA | GSE69034 | GSM331329 | ROCHE | GSE39671 |
| GSM877723 | SAPIENZA | GSE69034 | GSM331330 | ROCHE | GSE39671 |
| GSM877724 | SAPIENZA | GSE69034 | GSM331331 | ROCHE | GSE39671 |

|           |          |          |           |        |          |
|-----------|----------|----------|-----------|--------|----------|
| GSM877725 | SAPIENZA | GSE69034 | GSM331332 | ROCHE  | GSE39671 |
| GSM877726 | SAPIENZA | GSE69034 | GSM331333 | ROCHE  | GSE39671 |
| GSM877727 | SAPIENZA | GSE69034 | GSM331334 | ROCHE  | GSE39671 |
| GSM877728 | SAPIENZA | GSE69034 | GSM331336 | ROCHE  | GSE39671 |
| GSM877729 | SAPIENZA | GSE69034 | GSM331339 | ROCHE  | GSE39671 |
| GSM877730 | SAPIENZA | GSE69034 | GSM331340 | ROCHE  | GSE39671 |
| GSM877731 | SAPIENZA | GSE69034 | GSM331342 | ROCHE  | GSE39671 |
| GSM877732 | SAPIENZA | GSE69034 | GSM331343 | ROCHE  | GSE39671 |
| GSM877733 | SAPIENZA | GSE69034 | GSM331344 | ROCHE  | GSE39671 |
| GSM877734 | SAPIENZA | GSE69034 | GSM331347 | ROCHE  | GSE39671 |
| GSM877735 | SAPIENZA | GSE69034 | GSM331348 | ROCHE  | GSE39671 |
| GSM877736 | SAPIENZA | GSE69034 | GSM331350 | ROCHE  | GSE39671 |
| GSM877737 | SAPIENZA | GSE69034 | GSM331351 | ROCHE  | GSE39671 |
| GSM877738 | SAPIENZA | GSE69034 | GSM331352 | ROCHE  | GSE39671 |
| GSM877739 | SAPIENZA | GSE69034 | GSM331354 | ROCHE  | GSE39671 |
| GSM877740 | SAPIENZA | GSE69034 | GSM331358 | ROCHE  | GSE39671 |
| GSM877741 | SAPIENZA | GSE69034 | GSM331359 | ROCHE  | GSE39671 |
| GSM877742 | SAPIENZA | GSE69034 | GSM331362 | ROCHE  | GSE39671 |
| GSM877743 | SAPIENZA | GSE69034 | GSM331363 | ROCHE  | GSE39671 |
| GSM877744 | SAPIENZA | GSE69034 | GSM331364 | ROCHE  | GSE39671 |
| GSM877745 | SAPIENZA | GSE69034 | GSM331365 | ROCHE  | GSE39671 |
| GSM877746 | SAPIENZA | GSE69034 | GSM331366 | ROCHE  | GSE39671 |
| GSM877747 | SAPIENZA | GSE69034 | GSM331368 | ROCHE  | GSE39671 |
| GSM877748 | SAPIENZA | GSE69034 | GSM331369 | ROCHE  | GSE39671 |
| GSM877749 | SAPIENZA | GSE69034 | GSM331370 | ROCHE  | GSE39671 |
| GSM877750 | SAPIENZA | GSE69034 | GSM331371 | ROCHE  | GSE39671 |
| GSM877751 | SAPIENZA | GSE69034 | GSM331372 | ROCHE  | GSE39671 |
| GSM877752 | SAPIENZA | GSE69034 | GSM331373 | ROCHE  | GSE39671 |
| GSM877753 | SAPIENZA | GSE69034 | GSM331374 | ROCHE  | GSE39671 |
| GSM256312 | DUKE     | GSE35935 | GSM331376 | ROCHE  | GSE39671 |
| GSM256313 | DUKE     | GSE35935 | GSM709859 | PADOVA | GSE28654 |
| GSM256314 | DUKE     | GSE35935 | GSM709860 | PADOVA | GSE28654 |
| GSM256284 | DUKE     | GSE35935 | GSM709861 | PADOVA | GSE28654 |
| GSM256285 | DUKE     | GSE35935 | GSM709862 | PADOVA | GSE28654 |
| GSM256315 | DUKE     | GSE35935 | GSM709863 | PADOVA | GSE28654 |

|           |      |          |           |        |          |
|-----------|------|----------|-----------|--------|----------|
| GSM256265 | DUKE | GSE35935 | GSM709864 | PADOVA | GSE28654 |
| GSM256286 | DUKE | GSE35935 | GSM709865 | PADOVA | GSE28654 |
| GSM256287 | DUKE | GSE35935 | GSM709866 | PADOVA | GSE28654 |
| GSM256316 | DUKE | GSE35935 | GSM709867 | PADOVA | GSE28654 |
| GSM256317 | DUKE | GSE35935 | GSM709868 | PADOVA | GSE28654 |
| GSM256288 | DUKE | GSE35935 | GSM709869 | PADOVA | GSE28654 |
| GSM256318 | DUKE | GSE35935 | GSM709870 | PADOVA | GSE28654 |
| GSM256319 | DUKE | GSE35935 | GSM709871 | PADOVA | GSE28654 |
| GSM256289 | DUKE | GSE35935 | GSM709872 | PADOVA | GSE28654 |
| GSM256290 | DUKE | GSE35935 | GSM709873 | PADOVA | GSE28654 |
| GSM256291 | DUKE | GSE35935 | GSM709874 | PADOVA | GSE28654 |
| GSM256320 | DUKE | GSE35935 | GSM709875 | PADOVA | GSE28654 |
| GSM256292 | DUKE | GSE35935 | GSM709876 | PADOVA | GSE28654 |
| GSM256321 | DUKE | GSE35935 | GSM709877 | PADOVA | GSE28654 |
| GSM256293 | DUKE | GSE35935 | GSM709878 | PADOVA | GSE28654 |
| GSM256294 | DUKE | GSE35935 | GSM709879 | PADOVA | GSE28654 |
| GSM256295 | DUKE | GSE35935 | GSM709880 | PADOVA | GSE28654 |
| GSM256296 | DUKE | GSE35935 | GSM709881 | PADOVA | GSE28654 |
| GSM256297 | DUKE | GSE35935 | GSM709882 | PADOVA | GSE28654 |
| GSM256322 | DUKE | GSE35935 | GSM709883 | PADOVA | GSE28654 |
| GSM256323 | DUKE | GSE35935 | GSM709884 | PADOVA | GSE28654 |
| GSM256324 | DUKE | GSE35935 | GSM709885 | PADOVA | GSE28654 |
| GSM256266 | DUKE | GSE35935 | GSM709886 | PADOVA | GSE28654 |
| GSM256325 | DUKE | GSE35935 | GSM709887 | PADOVA | GSE28654 |
| GSM256326 | DUKE | GSE35935 | GSM709888 | PADOVA | GSE28654 |
| GSM256327 | DUKE | GSE35935 | GSM709889 | PADOVA | GSE28654 |
| GSM256328 | DUKE | GSE35935 | GSM709890 | PADOVA | GSE28654 |
| GSM256329 | DUKE | GSE35935 | GSM709891 | PADOVA | GSE28654 |
| GSM256330 | DUKE | GSE35935 | GSM709892 | PADOVA | GSE28654 |
| GSM256331 | DUKE | GSE35935 | GSM709893 | PADOVA | GSE28654 |
| GSM256298 | DUKE | GSE35935 | GSM709894 | PADOVA | GSE28654 |
| GSM256299 | DUKE | GSE35935 | GSM709895 | PADOVA | GSE28654 |
| GSM256267 | DUKE | GSE35935 | GSM709896 | PADOVA | GSE28654 |
| GSM256268 | DUKE | GSE35935 | GSM709897 | PADOVA | GSE28654 |
| GSM256269 | DUKE | GSE35935 | GSM709898 | PADOVA | GSE28654 |

|           |        |          |           |        |          |
|-----------|--------|----------|-----------|--------|----------|
| GSM256270 | DUKE   | GSE35935 | GSM709899 | PADOVA | GSE28654 |
| GSM256271 | DUKE   | GSE35935 | GSM709900 | PADOVA | GSE28654 |
| GSM256272 | DUKE   | GSE35935 | GSM709901 | PADOVA | GSE28654 |
| GSM256300 | DUKE   | GSE35935 | GSM709902 | PADOVA | GSE28654 |
| GSM256301 | DUKE   | GSE35935 | GSM709903 | PADOVA | GSE28654 |
| GSM256273 | DUKE   | GSE35935 | GSM709904 | PADOVA | GSE28654 |
| GSM256302 | DUKE   | GSE35935 | GSM709905 | PADOVA | GSE28654 |
| GSM256303 | DUKE   | GSE35935 | GSM709906 | PADOVA | GSE28654 |
| GSM256264 | DUKE   | GSE35935 | GSM709907 | PADOVA | GSE28654 |
| GSM256304 | DUKE   | GSE35935 | GSM709908 | PADOVA | GSE28654 |
| GSM256305 | DUKE   | GSE35935 | GSM709909 | PADOVA | GSE28654 |
| GSM256274 | DUKE   | GSE35935 | GSM709910 | PADOVA | GSE28654 |
| GSM256275 | DUKE   | GSE35935 | GSM709911 | PADOVA | GSE28654 |
| GSM256276 | DUKE   | GSE35935 | GSM709912 | PADOVA | GSE28654 |
| GSM256306 | DUKE   | GSE35935 | GSM709913 | PADOVA | GSE28654 |
| GSM256277 | DUKE   | GSE35935 | GSM709914 | PADOVA | GSE28654 |
| GSM256307 | DUKE   | GSE35935 | GSM709915 | PADOVA | GSE28654 |
| GSM256278 | DUKE   | GSE35935 | GSM709916 | PADOVA | GSE28654 |
| GSM256308 | DUKE   | GSE35935 | GSM709917 | PADOVA | GSE28654 |
| GSM256279 | DUKE   | GSE35935 | GSM709918 | PADOVA | GSE28654 |
| GSM256280 | DUKE   | GSE35935 | GSM709919 | PADOVA | GSE28654 |
| GSM256281 | DUKE   | GSE35935 | GSM709920 | PADOVA | GSE28654 |
| GSM256309 | DUKE   | GSE35935 | GSM709921 | PADOVA | GSE28654 |
| GSM256310 | DUKE   | GSE35935 | GSM709922 | PADOVA | GSE28654 |
| GSM256282 | DUKE   | GSE35935 | GSM709923 | PADOVA | GSE28654 |
| GSM256283 | DUKE   | GSE35935 | GSM709924 | PADOVA | GSE28654 |
| GSM256311 | DUKE   | GSE35935 | GSM709925 | PADOVA | GSE28654 |
| GSM562854 | MUNICH | GSE13204 | GSM709926 | PADOVA | GSE28654 |
| GSM562948 | MUNICH | GSE13204 | GSM709927 | PADOVA | GSE28654 |
| GSM562949 | MUNICH | GSE13204 | GSM709928 | PADOVA | GSE28654 |
| GSM562950 | MUNICH | GSE13204 | GSM709929 | PADOVA | GSE28654 |
| GSM562951 | MUNICH | GSE13204 | GSM709930 | PADOVA | GSE28654 |
| GSM562856 | MUNICH | GSE13204 | GSM709931 | PADOVA | GSE28654 |
| GSM562952 | MUNICH | GSE13204 | GSM709932 | PADOVA | GSE28654 |
| GSM562953 | MUNICH | GSE13204 | GSM709933 | PADOVA | GSE28654 |

|           |        |          |           |        |          |
|-----------|--------|----------|-----------|--------|----------|
| GSM562954 | MUNICH | GSE13204 | GSM709934 | PADOVA | GSE28654 |
| GSM562955 | MUNICH | GSE13204 | GSM709935 | PADOVA | GSE28654 |
| GSM562858 | MUNICH | GSE13204 | GSM709936 | PADOVA | GSE28654 |
| GSM562957 | MUNICH | GSE13204 | GSM709937 | PADOVA | GSE28654 |
| GSM562860 | MUNICH | GSE13204 | GSM709938 | PADOVA | GSE28654 |
| GSM562958 | MUNICH | GSE13204 | GSM709939 | PADOVA | GSE28654 |
| GSM562959 | MUNICH | GSE13204 | GSM709940 | PADOVA | GSE28654 |
| GSM562960 | MUNICH | GSE13204 | GSM709941 | PADOVA | GSE28654 |
| GSM562861 | MUNICH | GSE13204 | GSM709942 | PADOVA | GSE28654 |
| GSM562862 | MUNICH | GSE13204 | GSM709943 | PADOVA | GSE28654 |
| GSM562961 | MUNICH | GSE13204 | GSM709944 | PADOVA | GSE28654 |
| GSM562962 | MUNICH | GSE13204 | GSM709945 | PADOVA | GSE28654 |
| GSM562963 | MUNICH | GSE13204 | GSM709946 | PADOVA | GSE28654 |
| GSM562964 | MUNICH | GSE13204 | GSM709947 | PADOVA | GSE28654 |
| GSM562863 | MUNICH | GSE13204 | GSM709948 | PADOVA | GSE28654 |
| GSM562965 | MUNICH | GSE13204 | GSM709949 | PADOVA | GSE28654 |
| GSM562864 | MUNICH | GSE13204 | GSM709950 | PADOVA | GSE28654 |
| GSM562968 | MUNICH | GSE13204 | GSM709951 | PADOVA | GSE28654 |
| GSM562969 | MUNICH | GSE13204 | GSM709952 | PADOVA | GSE28654 |
| GSM562866 | MUNICH | GSE13204 | GSM709953 | PADOVA | GSE28654 |
| GSM562867 | MUNICH | GSE13204 | GSM709954 | PADOVA | GSE28654 |
| GSM562868 | MUNICH | GSE13204 | GSM709955 | PADOVA | GSE28654 |
| GSM562869 | MUNICH | GSE13204 | GSM709956 | PADOVA | GSE28654 |
| GSM562971 | MUNICH | GSE13204 | GSM709957 | PADOVA | GSE28654 |
| GSM562870 | MUNICH | GSE13204 | GSM709958 | PADOVA | GSE28654 |
| GSM562871 | MUNICH | GSE13204 | GSM709959 | PADOVA | GSE28654 |
| GSM562972 | MUNICH | GSE13204 | GSM709960 | PADOVA | GSE28654 |
| GSM562973 | MUNICH | GSE13204 | GSM709961 | PADOVA | GSE28654 |
| GSM562874 | MUNICH | GSE13204 | GSM709962 | PADOVA | GSE28654 |
| GSM562974 | MUNICH | GSE13204 | GSM709963 | PADOVA | GSE28654 |
| GSM562975 | MUNICH | GSE13204 | GSM709964 | PADOVA | GSE28654 |
| GSM562875 | MUNICH | GSE13204 | GSM709965 | PADOVA | GSE28654 |
| GSM562876 | MUNICH | GSE13204 | GSM709966 | PADOVA | GSE28654 |
| GSM562976 | MUNICH | GSE13204 | GSM709967 | PADOVA | GSE28654 |
| GSM562977 | MUNICH | GSE13204 | GSM709968 | PADOVA | GSE28654 |

|           |        |          |           |        |          |
|-----------|--------|----------|-----------|--------|----------|
| GSM562978 | MUNICH | GSE13204 | GSM709969 | PADOVA | GSE28654 |
| GSM562877 | MUNICH | GSE13204 | GSM709970 | PADOVA | GSE28654 |
| GSM562979 | MUNICH | GSE13204 | GSM977137 | UCSD   | GSE50006 |
| GSM562980 | MUNICH | GSE13204 | GSM977138 | UCSD   | GSE50006 |
| GSM562982 | MUNICH | GSE13204 | GSM977139 | UCSD   | GSE50006 |
| GSM562879 | MUNICH | GSE13204 | GSM977140 | UCSD   | GSE50006 |
| GSM562983 | MUNICH | GSE13204 | GSM977141 | UCSD   | GSE50006 |
| GSM562880 | MUNICH | GSE13204 | GSM977142 | UCSD   | GSE50006 |
| GSM562984 | MUNICH | GSE13204 | GSM977143 | UCSD   | GSE50006 |
| GSM562985 | MUNICH | GSE13204 | GSM977144 | UCSD   | GSE50006 |
| GSM562881 | MUNICH | GSE13204 | GSM977145 | UCSD   | GSE50006 |
| GSM562986 | MUNICH | GSE13204 | GSM977146 | UCSD   | GSE50006 |
| GSM562987 | MUNICH | GSE13204 | GSM977147 | UCSD   | GSE50006 |
| GSM562988 | MUNICH | GSE13204 | GSM977148 | UCSD   | GSE50006 |
| GSM562989 | MUNICH | GSE13204 | GSM977149 | UCSD   | GSE50006 |
| GSM562990 | MUNICH | GSE13204 | GSM977150 | UCSD   | GSE50006 |
| GSM562991 | MUNICH | GSE13204 | GSM977151 | UCSD   | GSE50006 |
| GSM562992 | MUNICH | GSE13204 | GSM977152 | UCSD   | GSE50006 |
| GSM562882 | MUNICH | GSE13204 | GSM977153 | UCSD   | GSE50006 |
| GSM562993 | MUNICH | GSE13204 | GSM977154 | UCSD   | GSE50006 |
| GSM562994 | MUNICH | GSE13204 | GSM977155 | UCSD   | GSE50006 |
| GSM562995 | MUNICH | GSE13204 | GSM977156 | UCSD   | GSE50006 |
| GSM562996 | MUNICH | GSE13204 | GSM977157 | UCSD   | GSE50006 |
| GSM562883 | MUNICH | GSE13204 | GSM977158 | UCSD   | GSE50006 |
| GSM562884 | MUNICH | GSE13204 | GSM977159 | UCSD   | GSE50006 |
| GSM562998 | MUNICH | GSE13204 | GSM977160 | UCSD   | GSE50006 |
| GSM562999 | MUNICH | GSE13204 | GSM977161 | UCSD   | GSE50006 |
| GSM563000 | MUNICH | GSE13204 | GSM977162 | UCSD   | GSE50006 |
| GSM563001 | MUNICH | GSE13204 | GSM977163 | UCSD   | GSE50006 |
| GSM563004 | MUNICH | GSE13204 | GSM977164 | UCSD   | GSE50006 |
| GSM563005 | MUNICH | GSE13204 | GSM977165 | UCSD   | GSE50006 |
| GSM563006 | MUNICH | GSE13204 | GSM977166 | UCSD   | GSE50006 |
| GSM563007 | MUNICH | GSE13204 | GSM977167 | UCSD   | GSE50006 |
| GSM563008 | MUNICH | GSE13204 | GSM977168 | UCSD   | GSE50006 |
| GSM563010 | MUNICH | GSE13204 | GSM977169 | UCSD   | GSE50006 |

|           |        |          |           |      |          |
|-----------|--------|----------|-----------|------|----------|
| GSM563011 | MUNICH | GSE13204 | GSM977170 | UCSD | GSE50006 |
| GSM562885 | MUNICH | GSE13204 | GSM977171 | UCSD | GSE50006 |
| GSM563012 | MUNICH | GSE13204 | GSM977172 | UCSD | GSE50006 |
| GSM563013 | MUNICH | GSE13204 | GSM977173 | UCSD | GSE50006 |
| GSM563014 | MUNICH | GSE13204 | GSM977174 | UCSD | GSE50006 |
| GSM563015 | MUNICH | GSE13204 | GSM977175 | UCSD | GSE50006 |
| GSM563016 | MUNICH | GSE13204 | GSM977176 | UCSD | GSE50006 |
| GSM563017 | MUNICH | GSE13204 | GSM977177 | UCSD | GSE50006 |
| GSM562886 | MUNICH | GSE13204 | GSM977178 | UCSD | GSE50006 |
| GSM563018 | MUNICH | GSE13204 | GSM977179 | UCSD | GSE50006 |
| GSM563020 | MUNICH | GSE13204 | GSM977180 | UCSD | GSE50006 |
| GSM563021 | MUNICH | GSE13204 | GSM977181 | UCSD | GSE50006 |
| GSM563022 | MUNICH | GSE13204 | GSM977182 | UCSD | GSE50006 |
| GSM563023 | MUNICH | GSE13204 | GSM977183 | UCSD | GSE50006 |
| GSM563024 | MUNICH | GSE13204 | GSM977184 | UCSD | GSE50006 |
| GSM562887 | MUNICH | GSE13204 | GSM977185 | UCSD | GSE50006 |
| GSM563025 | MUNICH | GSE13204 | GSM977186 | UCSD | GSE50006 |
| GSM563026 | MUNICH | GSE13204 | GSM977187 | UCSD | GSE50006 |
| GSM563027 | MUNICH | GSE13204 | GSM977188 | UCSD | GSE50006 |
| GSM563028 | MUNICH | GSE13204 | GSM977189 | UCSD | GSE50006 |
| GSM563029 | MUNICH | GSE13204 | GSM977190 | UCSD | GSE50006 |
| GSM563030 | MUNICH | GSE13204 | GSM977191 | UCSD | GSE50006 |
| GSM563031 | MUNICH | GSE13204 | GSM977192 | UCSD | GSE50006 |
| GSM563032 | MUNICH | GSE13204 | GSM977193 | UCSD | GSE50006 |
| GSM563033 | MUNICH | GSE13204 | GSM977194 | UCSD | GSE50006 |
| GSM562889 | MUNICH | GSE13204 | GSM977195 | UCSD | GSE50006 |
| GSM563034 | MUNICH | GSE13204 | GSM977196 | UCSD | GSE50006 |
| GSM563035 | MUNICH | GSE13204 | GSM977197 | UCSD | GSE50006 |
| GSM562891 | MUNICH | GSE13204 | GSM977198 | UCSD | GSE50006 |
| GSM563038 | MUNICH | GSE13204 | GSM977199 | UCSD | GSE50006 |
| GSM563039 | MUNICH | GSE13204 | GSM977200 | UCSD | GSE50006 |
| GSM563040 | MUNICH | GSE13204 | GSM977201 | UCSD | GSE50006 |
| GSM563041 | MUNICH | GSE13204 | GSM977202 | UCSD | GSE50006 |
| GSM563042 | MUNICH | GSE13204 | GSM977203 | UCSD | GSE50006 |
| GSM563043 | MUNICH | GSE13204 | GSM977204 | UCSD | GSE50006 |

|           |        |          |           |      |          |
|-----------|--------|----------|-----------|------|----------|
| GSM563044 | MUNICH | GSE13204 | GSM977205 | UCSD | GSE50006 |
| GSM562893 | MUNICH | GSE13204 | GSM977206 | UCSD | GSE50006 |
| GSM563045 | MUNICH | GSE13204 | GSM977207 | UCSD | GSE50006 |
| GSM562894 | MUNICH | GSE13204 | GSM977208 | UCSD | GSE50006 |
| GSM563046 | MUNICH | GSE13204 | GSM977209 | UCSD | GSE50006 |
| GSM563047 | MUNICH | GSE13204 | GSM977210 | UCSD | GSE50006 |
| GSM563048 | MUNICH | GSE13204 | GSM977211 | UCSD | GSE50006 |
| GSM563049 | MUNICH | GSE13204 | GSM977212 | UCSD | GSE50006 |
| GSM562896 | MUNICH | GSE13204 | GSM977213 | UCSD | GSE50006 |
| GSM563050 | MUNICH | GSE13204 | GSM977214 | UCSD | GSE50006 |
| GSM562897 | MUNICH | GSE13204 | GSM977215 | UCSD | GSE50006 |
| GSM563051 | MUNICH | GSE13204 | GSM977216 | UCSD | GSE50006 |
| GSM563053 | MUNICH | GSE13204 | GSM977217 | UCSD | GSE50006 |
| GSM563054 | MUNICH | GSE13204 | GSM977218 | UCSD | GSE50006 |
| GSM330930 | ROCHE  | GSE39671 | GSM977219 | UCSD | GSE50006 |
| GSM330931 | ROCHE  | GSE39671 | GSM977220 | UCSD | GSE50006 |
| GSM330932 | ROCHE  | GSE39671 | GSM977221 | UCSD | GSE50006 |
| GSM330933 | ROCHE  | GSE39671 | GSM977222 | UCSD | GSE50006 |
| GSM330934 | ROCHE  | GSE39671 | GSM977223 | UCSD | GSE50006 |
| GSM330936 | ROCHE  | GSE39671 | GSM977224 | UCSD | GSE50006 |
| GSM330938 | ROCHE  | GSE39671 | GSM977225 | UCSD | GSE50006 |
| GSM330939 | ROCHE  | GSE39671 | GSM977226 | UCSD | GSE50006 |
| GSM330943 | ROCHE  | GSE39671 | GSM977227 | UCSD | GSE50006 |
| GSM330944 | ROCHE  | GSE39671 | GSM977228 | UCSD | GSE50006 |
| GSM330945 | ROCHE  | GSE39671 | GSM977229 | UCSD | GSE50006 |
| GSM330946 | ROCHE  | GSE39671 | GSM977230 | UCSD | GSE50006 |
| GSM330947 | ROCHE  | GSE39671 | GSM977231 | UCSD | GSE50006 |
| GSM330948 | ROCHE  | GSE39671 | GSM977232 | UCSD | GSE50006 |
| GSM330951 | ROCHE  | GSE39671 | GSM977233 | UCSD | GSE50006 |
| GSM330952 | ROCHE  | GSE39671 | GSM977234 | UCSD | GSE50006 |
| GSM330953 | ROCHE  | GSE39671 | GSM977235 | UCSD | GSE50006 |
| GSM330954 | ROCHE  | GSE39671 | GSM977236 | UCSD | GSE50006 |
| GSM330955 | ROCHE  | GSE39671 | GSM977237 | UCSD | GSE50006 |
| GSM330956 | ROCHE  | GSE39671 | GSM977238 | UCSD | GSE50006 |
| GSM330958 | ROCHE  | GSE39671 | GSM977239 | UCSD | GSE50006 |



|           |       |          |            |       |          |
|-----------|-------|----------|------------|-------|----------|
| GSM330959 | ROCHE | GSE39671 | GSM977240  | UCSD  | GSE50006 |
| GSM330960 | ROCHE | GSE39671 | GSM977241  | UCSD  | GSE50006 |
| GSM330962 | ROCHE | GSE39671 | GSM977242  | UCSD  | GSE50006 |
| GSM330964 | ROCHE | GSE39671 | GSM977243  | UCSD  | GSE50006 |
| GSM330965 | ROCHE | GSE39671 | GSM977244  | UCSD  | GSE50006 |
| GSM330967 | ROCHE | GSE39671 | GSM977245  | UCSD  | GSE50006 |
| GSM330968 | ROCHE | GSE39671 | GSM977246  | UCSD  | GSE50006 |
| GSM330969 | ROCHE | GSE39671 | GSM977247  | UCSD  | GSE50006 |
| GSM330971 | ROCHE | GSE39671 | GSM977248  | UCSD  | GSE50006 |
| GSM330972 | ROCHE | GSE39671 | GSM977249  | UCSD  | GSE50006 |
| GSM330973 | ROCHE | GSE39671 | GSM977250  | UCSD  | GSE50006 |
| GSM330974 | ROCHE | GSE39671 | GSM977251  | UCSD  | GSE50006 |
| GSM330975 | ROCHE | GSE39671 | GSM977252  | UCSD  | GSE50006 |
| GSM330976 | ROCHE | GSE39671 | GSM977253  | UCSD  | GSE50006 |
| GSM330977 | ROCHE | GSE39671 | GSM977254  | UCSD  | GSE50006 |
| GSM330978 | ROCHE | GSE39671 | GSM977255  | UCSD  | GSE50006 |
| GSM330979 | ROCHE | GSE39671 | GSM977256  | UCSD  | GSE50006 |
| GSM330980 | ROCHE | GSE39671 | GSM977257  | UCSD  | GSE50006 |
| GSM330981 | ROCHE | GSE39671 | GSM977258  | UCSD  | GSE50006 |
| GSM330983 | ROCHE | GSE39671 | GSM977259  | UCSD  | GSE50006 |
| GSM330984 | ROCHE | GSE39671 | GSM977260  | UCSD  | GSE50006 |
| GSM330987 | ROCHE | GSE39671 | GSM977261  | UCSD  | GSE50006 |
| GSM330990 | ROCHE | GSE39671 | GSM977262  | UCSD  | GSE50006 |
| GSM330992 | ROCHE | GSE39671 | GSM977263  | UCSD  | GSE50006 |
| GSM330994 | ROCHE | GSE39671 | GSM977264  | UCSD  | GSE50006 |
| GSM330996 | ROCHE | GSE39671 | GSM977265  | UCSD  | GSE50006 |
| GSM330997 | ROCHE | GSE39671 | GSM977266  | UCSD  | GSE50006 |
| GSM330998 | ROCHE | GSE39671 | GSM1690814 | IDFCI | GSE10138 |
| GSM330999 | ROCHE | GSE39671 | GSM1690687 | IDFCI | GSE10138 |
| GSM331000 | ROCHE | GSE39671 | GSM1690688 | IDFCI | GSE10138 |
| GSM331001 | ROCHE | GSE39671 | GSM1690690 | IDFCI | GSE10138 |
| GSM331003 | ROCHE | GSE39671 | GSM1690692 | IDFCI | GSE10138 |
| GSM331004 | ROCHE | GSE39671 | GSM1690693 | IDFCI | GSE10138 |
| GSM331005 | ROCHE | GSE39671 | GSM1690823 | IDFCI | GSE10138 |
| GSM331007 | ROCHE | GSE39671 | GSM1690695 | IDFCI | GSE10138 |

|           |       |          |            |       |          |
|-----------|-------|----------|------------|-------|----------|
| GSM331008 | ROCHE | GSE39671 | GSM1690912 | IDFCI | GSE10138 |
| GSM331009 | ROCHE | GSE39671 | GSM1690824 | IDFCI | GSE10138 |
| GSM331011 | ROCHE | GSE39671 | GSM1690668 | IDFCI | GSE10138 |
| GSM331013 | ROCHE | GSE39671 | GSM1690826 | IDFCI | GSE10138 |
| GSM331014 | ROCHE | GSE39671 | GSM1690828 | IDFCI | GSE10138 |
| GSM331016 | ROCHE | GSE39671 | GSM1690671 | IDFCI | GSE10138 |
| GSM331017 | ROCHE | GSE39671 | GSM1690697 | IDFCI | GSE10138 |
| GSM331019 | ROCHE | GSE39671 | GSM1690698 | IDFCI | GSE10138 |
| GSM331020 | ROCHE | GSE39671 | GSM1690700 | IDFCI | GSE10138 |
| GSM331021 | ROCHE | GSE39671 | GSM1690831 | IDFCI | GSE10138 |
| GSM331022 | ROCHE | GSE39671 | GSM1690833 | IDFCI | GSE10138 |
| GSM331023 | ROCHE | GSE39671 | GSM1690702 | IDFCI | GSE10138 |
| GSM331025 | ROCHE | GSE39671 | GSM1690703 | IDFCI | GSE10138 |
| GSM331026 | ROCHE | GSE39671 | GSM1690835 | IDFCI | GSE10138 |
| GSM331030 | ROCHE | GSE39671 | GSM1690705 | IDFCI | GSE10138 |
| GSM331031 | ROCHE | GSE39671 | GSM1690707 | IDFCI | GSE10138 |
| GSM331033 | ROCHE | GSE39671 | GSM1690673 | IDFCI | GSE10138 |
| GSM331034 | ROCHE | GSE39671 | GSM1690709 | IDFCI | GSE10138 |
| GSM331035 | ROCHE | GSE39671 | GSM1690710 | IDFCI | GSE10138 |
| GSM331037 | ROCHE | GSE39671 | GSM1690836 | IDFCI | GSE10138 |
| GSM331038 | ROCHE | GSE39671 | GSM1690712 | IDFCI | GSE10138 |
| GSM331040 | ROCHE | GSE39671 | GSM1690713 | IDFCI | GSE10138 |
| GSM331041 | ROCHE | GSE39671 | GSM1690715 | IDFCI | GSE10138 |
| GSM331042 | ROCHE | GSE39671 | GSM1690717 | IDFCI | GSE10138 |
| GSM331043 | ROCHE | GSE39671 | GSM1690840 | IDFCI | GSE10138 |
| GSM331044 | ROCHE | GSE39671 | GSM1690718 | IDFCI | GSE10138 |
| GSM331045 | ROCHE | GSE39671 | GSM1690720 | IDFCI | GSE10138 |
| GSM331046 | ROCHE | GSE39671 | GSM1690914 | IDFCI | GSE10138 |
| GSM331047 | ROCHE | GSE39671 | GSM1690722 | IDFCI | GSE10138 |
| GSM331049 | ROCHE | GSE39671 | GSM1690723 | IDFCI | GSE10138 |
| GSM331050 | ROCHE | GSE39671 | GSM1690841 | IDFCI | GSE10138 |
| GSM331052 | ROCHE | GSE39671 | GSM1690916 | IDFCI | GSE10138 |
| GSM331054 | ROCHE | GSE39671 | GSM1690725 | IDFCI | GSE10138 |
| GSM331055 | ROCHE | GSE39671 | GSM1690917 | IDFCI | GSE10138 |
| GSM331056 | ROCHE | GSE39671 | GSM1690843 | IDFCI | GSE10138 |

|           |       |          |            |       |          |
|-----------|-------|----------|------------|-------|----------|
| GSM331057 | ROCHE | GSE39671 | GSM1690727 | IDFCI | GSE10138 |
| GSM331059 | ROCHE | GSE39671 | GSM1690674 | IDFCI | GSE10138 |
| GSM331060 | ROCHE | GSE39671 | GSM1690728 | IDFCI | GSE10138 |
| GSM331061 | ROCHE | GSE39671 | GSM1690850 | IDFCI | GSE10138 |
| GSM331063 | ROCHE | GSE39671 | GSM1690851 | IDFCI | GSE10138 |
| GSM331065 | ROCHE | GSE39671 | GSM1690730 | IDFCI | GSE10138 |
| GSM331069 | ROCHE | GSE39671 | GSM1690732 | IDFCI | GSE10138 |
| GSM331070 | ROCHE | GSE39671 | GSM1690735 | IDFCI | GSE10138 |
| GSM331071 | ROCHE | GSE39671 | GSM1690737 | IDFCI | GSE10138 |
| GSM331073 | ROCHE | GSE39671 | GSM1690738 | IDFCI | GSE10138 |
| GSM331074 | ROCHE | GSE39671 | GSM1690860 | IDFCI | GSE10138 |
| GSM331075 | ROCHE | GSE39671 | GSM1690862 | IDFCI | GSE10138 |
| GSM331077 | ROCHE | GSE39671 | GSM1690739 | IDFCI | GSE10138 |
| GSM331078 | ROCHE | GSE39671 | GSM1690741 | IDFCI | GSE10138 |
| GSM331081 | ROCHE | GSE39671 | GSM1690863 | IDFCI | GSE10138 |
| GSM331082 | ROCHE | GSE39671 | GSM1690743 | IDFCI | GSE10138 |
| GSM331083 | ROCHE | GSE39671 | GSM1690745 | IDFCI | GSE10138 |
| GSM331084 | ROCHE | GSE39671 | GSM1690746 | IDFCI | GSE10138 |
| GSM331085 | ROCHE | GSE39671 | GSM1690748 | IDFCI | GSE10138 |
| GSM331086 | ROCHE | GSE39671 | GSM1690865 | IDFCI | GSE10138 |
| GSM331087 | ROCHE | GSE39671 | GSM1690867 | IDFCI | GSE10138 |
| GSM331088 | ROCHE | GSE39671 | GSM1690869 | IDFCI | GSE10138 |
| GSM331090 | ROCHE | GSE39671 | GSM1690870 | IDFCI | GSE10138 |
| GSM331091 | ROCHE | GSE39671 | GSM1690872 | IDFCI | GSE10138 |
| GSM331092 | ROCHE | GSE39671 | GSM1690874 | IDFCI | GSE10138 |
| GSM331093 | ROCHE | GSE39671 | GSM1690876 | IDFCI | GSE10138 |
| GSM331096 | ROCHE | GSE39671 | GSM1690877 | IDFCI | GSE10138 |
| GSM331097 | ROCHE | GSE39671 | GSM1690750 | IDFCI | GSE10138 |
| GSM331098 | ROCHE | GSE39671 | GSM1690752 | IDFCI | GSE10138 |
| GSM331099 | ROCHE | GSE39671 | GSM1690754 | IDFCI | GSE10138 |
| GSM331101 | ROCHE | GSE39671 | GSM1690881 | IDFCI | GSE10138 |
| GSM331102 | ROCHE | GSE39671 | GSM1690755 | IDFCI | GSE10138 |
| GSM331104 | ROCHE | GSE39671 | GSM1690757 | IDFCI | GSE10138 |
| GSM331105 | ROCHE | GSE39671 | GSM1690884 | IDFCI | GSE10138 |
| GSM331106 | ROCHE | GSE39671 | GSM1690759 | IDFCI | GSE10138 |

|           |       |          |            |       |          |
|-----------|-------|----------|------------|-------|----------|
| GSM331107 | ROCHE | GSE39671 | GSM1690676 | IDFCI | GSE10138 |
| GSM331108 | ROCHE | GSE39671 | GSM1690760 | IDFCI | GSE10138 |
| GSM331110 | ROCHE | GSE39671 | GSM1690762 | IDFCI | GSE10138 |
| GSM331111 | ROCHE | GSE39671 | GSM1690764 | IDFCI | GSE10138 |
| GSM331112 | ROCHE | GSE39671 | GSM1690678 | IDFCI | GSE10138 |
| GSM331113 | ROCHE | GSE39671 | GSM1690766 | IDFCI | GSE10138 |
| GSM331115 | ROCHE | GSE39671 | GSM1690767 | IDFCI | GSE10138 |
| GSM331116 | ROCHE | GSE39671 | GSM1690769 | IDFCI | GSE10138 |
| GSM331117 | ROCHE | GSE39671 | GSM1690771 | IDFCI | GSE10138 |
| GSM331118 | ROCHE | GSE39671 | GSM1690773 | IDFCI | GSE10138 |
| GSM331119 | ROCHE | GSE39671 | GSM1690774 | IDFCI | GSE10138 |
| GSM331121 | ROCHE | GSE39671 | GSM1690885 | IDFCI | GSE10138 |
| GSM331122 | ROCHE | GSE39671 | GSM1690886 | IDFCI | GSE10138 |
| GSM331123 | ROCHE | GSE39671 | GSM1690776 | IDFCI | GSE10138 |
| GSM331124 | ROCHE | GSE39671 | GSM1690778 | IDFCI | GSE10138 |
| GSM331125 | ROCHE | GSE39671 | GSM1690779 | IDFCI | GSE10138 |
| GSM331126 | ROCHE | GSE39671 | GSM1690890 | IDFCI | GSE10138 |
| GSM331130 | ROCHE | GSE39671 | GSM1690781 | IDFCI | GSE10138 |
| GSM331131 | ROCHE | GSE39671 | GSM1690783 | IDFCI | GSE10138 |
| GSM331133 | ROCHE | GSE39671 | GSM1690892 | IDFCI | GSE10138 |
| GSM331134 | ROCHE | GSE39671 | GSM1690784 | IDFCI | GSE10138 |
| GSM331135 | ROCHE | GSE39671 | GSM1690786 | IDFCI | GSE10138 |
| GSM331136 | ROCHE | GSE39671 | GSM1690787 | IDFCI | GSE10138 |
| GSM331137 | ROCHE | GSE39671 | GSM1690681 | IDFCI | GSE10138 |
| GSM331138 | ROCHE | GSE39671 | GSM1690791 | IDFCI | GSE10138 |
| GSM331139 | ROCHE | GSE39671 | GSM1690895 | IDFCI | GSE10138 |
| GSM331140 | ROCHE | GSE39671 | GSM1690792 | IDFCI | GSE10138 |
| GSM331144 | ROCHE | GSE39671 | GSM1690683 | IDFCI | GSE10138 |
| GSM331145 | ROCHE | GSE39671 | GSM1690794 | IDFCI | GSE10138 |
| GSM331146 | ROCHE | GSE39671 | GSM1690898 | IDFCI | GSE10138 |
| GSM331147 | ROCHE | GSE39671 | GSM1690796 | IDFCI | GSE10138 |
| GSM331148 | ROCHE | GSE39671 | GSM1690900 | IDFCI | GSE10138 |
| GSM331149 | ROCHE | GSE39671 | GSM1690902 | IDFCI | GSE10138 |
| GSM331151 | ROCHE | GSE39671 | GSM1690797 | IDFCI | GSE10138 |
| GSM331152 | ROCHE | GSE39671 | GSM1690904 | IDFCI | GSE10138 |

|           |       |          |            |        |          |
|-----------|-------|----------|------------|--------|----------|
| GSM331153 | ROCHE | GSE39671 | GSM1690905 | IDFCI  | GSE10138 |
| GSM331155 | ROCHE | GSE39671 | GSM1690907 | IDFCI  | GSE10138 |
| GSM331156 | ROCHE | GSE39671 | GSM1690909 | IDFCI  | GSE10138 |
| GSM331157 | ROCHE | GSE39671 | GSM1690799 | IDFCI  | GSE10138 |
| GSM331158 | ROCHE | GSE39671 | GSM1690802 | IDFCI  | GSE10138 |
| GSM331159 | ROCHE | GSE39671 | GSM1690804 | IDFCI  | GSE10138 |
| GSM331160 | ROCHE | GSE39671 | GSM1690806 | IDFCI  | GSE10138 |
| GSM331161 | ROCHE | GSE39671 | GSM1690807 | IDFCI  | GSE10138 |
| GSM331163 | ROCHE | GSE39671 | GSM1690911 | IDFCI  | GSE10138 |
| GSM331164 | ROCHE | GSE39671 | GSM1690810 | IDFCI  | GSE10138 |
| GSM331166 | ROCHE | GSE39671 | GSM1690812 | IDFCI  | GSE10138 |
| GSM331168 | ROCHE | GSE39671 | GSM1211902 | IIDFCI | GSE22762 |
| GSM331169 | ROCHE | GSE39671 | GSM1211924 | IIDFCI | GSE22762 |
| GSM331170 | ROCHE | GSE39671 | GSM1211947 | IIDFCI | GSE22762 |
| GSM331171 | ROCHE | GSE39671 | GSM1211952 | IIDFCI | GSE22762 |
| GSM331172 | ROCHE | GSE39671 | GSM1211973 | IIDFCI | GSE22762 |
| GSM331173 | ROCHE | GSE39671 | GSM1211975 | IIDFCI | GSE22762 |
| GSM331175 | ROCHE | GSE39671 | GSM1211977 | IIDFCI | GSE22762 |
| GSM331176 | ROCHE | GSE39671 | GSM1211978 | IIDFCI | GSE22762 |
| GSM331177 | ROCHE | GSE39671 | GSM1211979 | IIDFCI | GSE22762 |
| GSM331178 | ROCHE | GSE39671 | GSM1211981 | IIDFCI | GSE22762 |
| GSM331179 | ROCHE | GSE39671 | GSM1211984 | IIDFCI | GSE22762 |
| GSM331183 | ROCHE | GSE39671 | GSM1211990 | IIDFCI | GSE22762 |
| GSM331184 | ROCHE | GSE39671 | GSM1211993 | IIDFCI | GSE22762 |
| GSM331185 | ROCHE | GSE39671 | GSM1211995 | IIDFCI | GSE22762 |
| GSM331188 | ROCHE | GSE39671 | GSM1211999 | IIDFCI | GSE22762 |
| GSM331189 | ROCHE | GSE39671 | GSM1212001 | IIDFCI | GSE22762 |
| GSM331192 | ROCHE | GSE39671 | GSM1212003 | IIDFCI | GSE22762 |
| GSM331193 | ROCHE | GSE39671 | GSM1212004 | IIDFCI | GSE22762 |
| GSM331194 | ROCHE | GSE39671 | GSM1212008 | IIDFCI | GSE22762 |
| GSM331195 | ROCHE | GSE39671 | GSM1212016 | IIDFCI | GSE22762 |
| GSM331196 | ROCHE | GSE39671 | GSM1212017 | IIDFCI | GSE22762 |
| GSM331197 | ROCHE | GSE39671 | GSM1212020 | IIDFCI | GSE22762 |
| GSM331201 | ROCHE | GSE39671 | GSM1212022 | IIDFCI | GSE22762 |
| GSM331202 | ROCHE | GSE39671 | GSM1212030 | IIDFCI | GSE22762 |

|           |       |          |            |        |          |
|-----------|-------|----------|------------|--------|----------|
| GSM331203 | ROCHE | GSE39671 | GSM1212032 | IIDFCI | GSE22762 |
| GSM331207 | ROCHE | GSE39671 | GSM1212039 | IIDFCI | GSE22762 |
| GSM331208 | ROCHE | GSE39671 | GSM1212044 | IIDFCI | GSE22762 |
| GSM331209 | ROCHE | GSE39671 | GSM1212047 | IIDFCI | GSE22762 |
| GSM331210 | ROCHE | GSE39671 | GSM1212048 | IIDFCI | GSE22762 |
| GSM331211 | ROCHE | GSE39671 | GSM1212049 | IIDFCI | GSE22762 |
| GSM331214 | ROCHE | GSE39671 | GSM1212051 | IIDFCI | GSE22762 |
| GSM331215 | ROCHE | GSE39671 | GSM1212058 | IIDFCI | GSE22762 |
| GSM331216 | ROCHE | GSE39671 | GSM1212061 | IIDFCI | GSE22762 |
| GSM331219 | ROCHE | GSE39671 | GSM1212063 | IIDFCI | GSE22762 |
| GSM331222 | ROCHE | GSE39671 | GSM1212064 | IIDFCI | GSE22762 |
| GSM331223 | ROCHE | GSE39671 | GSM1212065 | IIDFCI | GSE22762 |
| GSM331225 | ROCHE | GSE39671 | GSM1212066 | IIDFCI | GSE22762 |
| GSM331226 | ROCHE | GSE39671 | GSM1212067 | IIDFCI | GSE22762 |
| GSM331227 | ROCHE | GSE39671 | GSM1212069 | IIDFCI | GSE22762 |
| GSM331228 | ROCHE | GSE39671 | GSM1212070 | IIDFCI | GSE22762 |
| GSM331229 | ROCHE | GSE39671 | GSM1212079 | IIDFCI | GSE22762 |
| GSM331230 | ROCHE | GSE39671 | GSM1212080 | IIDFCI | GSE22762 |
| GSM331232 | ROCHE | GSE39671 | GSM1212081 | IIDFCI | GSE22762 |
| GSM331233 | ROCHE | GSE39671 | GSM1212083 | IIDFCI | GSE22762 |
| GSM331234 | ROCHE | GSE39671 | GSM1212087 | IIDFCI | GSE22762 |
| GSM331235 | ROCHE | GSE39671 | GSM1212088 | IIDFCI | GSE22762 |
| GSM331236 | ROCHE | GSE39671 | GSM1212090 | IIDFCI | GSE22762 |
| GSM331237 | ROCHE | GSE39671 | GSM1212096 | IIDFCI | GSE22762 |
| GSM331238 | ROCHE | GSE39671 | GSM1212098 | IIDFCI | GSE22762 |
| GSM331240 | ROCHE | GSE39671 | GSM1212099 | IIDFCI | GSE22762 |
| GSM331241 | ROCHE | GSE39671 | GSM1212102 | IIDFCI | GSE22762 |
| GSM331242 | ROCHE | GSE39671 | GSM1212104 | IIDFCI | GSE22762 |
| GSM331243 | ROCHE | GSE39671 | GSM1212106 | IIDFCI | GSE22762 |
| GSM331245 | ROCHE | GSE39671 | GSM1212110 | IIDFCI | GSE22762 |
| GSM331246 | ROCHE | GSE39671 | GSM1212111 | IIDFCI | GSE22762 |
| GSM331248 | ROCHE | GSE39671 | GSM1212112 | IIDFCI | GSE22762 |
| GSM331250 | ROCHE | GSE39671 | GSM1212113 | IIDFCI | GSE22762 |
| GSM331251 | ROCHE | GSE39671 | GSM1212115 | IIDFCI | GSE22762 |
| GSM331252 | ROCHE | GSE39671 | GSM1212118 | IIDFCI | GSE22762 |

|           |       |          |            |        |          |
|-----------|-------|----------|------------|--------|----------|
| GSM331253 | ROCHE | GSE39671 | GSM1212120 | IIDFCI | GSE22762 |
| GSM331254 | ROCHE | GSE39671 | GSM1212124 | IIDFCI | GSE22762 |
| GSM331257 | ROCHE | GSE39671 | GSM1212125 | IIDFCI | GSE22762 |
| GSM331258 | ROCHE | GSE39671 | GSM1212126 | IIDFCI | GSE22762 |
| GSM331259 | ROCHE | GSE39671 | GSM1212132 | IIDFCI | GSE22762 |
| GSM331260 | ROCHE | GSE39671 | GSM1212133 | IIDFCI | GSE22762 |
| GSM331261 | ROCHE | GSE39671 | GSM1212134 | IIDFCI | GSE22762 |
| GSM331262 | ROCHE | GSE39671 | GSM1212135 | IIDFCI | GSE22762 |
| GSM331266 | ROCHE | GSE39671 | GSM1212136 | IIDFCI | GSE22762 |
| GSM331267 | ROCHE | GSE39671 | GSM1212138 | IIDFCI | GSE22762 |
| GSM331271 | ROCHE | GSE39671 | GSM1212140 | IIDFCI | GSE22762 |
| GSM331272 | ROCHE | GSE39671 | GSM1212141 | IIDFCI | GSE22762 |
| GSM331273 | ROCHE | GSE39671 | GSM1212146 | IIDFCI | GSE22762 |
| GSM331274 | ROCHE | GSE39671 | GSM1212148 | IIDFCI | GSE22762 |
| GSM331275 | ROCHE | GSE39671 | GSM1212156 | IIDFCI | GSE22762 |
| GSM331276 | ROCHE | GSE39671 | GSM1212157 | IIDFCI | GSE22762 |
| GSM331277 | ROCHE | GSE39671 | GSM1212160 | IIDFCI | GSE22762 |
| GSM331279 | ROCHE | GSE39671 | GSM1212162 | IIDFCI | GSE22762 |
| GSM331280 | ROCHE | GSE39671 | GSM1212164 | IIDFCI | GSE22762 |
| GSM331281 | ROCHE | GSE39671 | GSM1212167 | IIDFCI | GSE22762 |
| GSM331282 | ROCHE | GSE39671 | GSM1212170 | IIDFCI | GSE22762 |
| GSM331283 | ROCHE | GSE39671 | GSM1212171 | IIDFCI | GSE22762 |
| GSM331285 | ROCHE | GSE39671 | GSM1212172 | IIDFCI | GSE22762 |
| GSM331286 | ROCHE | GSE39671 | GSM1212173 | IIDFCI | GSE22762 |

NOTE. Unique GEO accession numbers (GSMxxx), GEO series numbers (GSExxx), and study center are listed for all included samples ( $n=1,024$ ).
