# Supplementary material for: Subtype assignment of CLL based on B-cell subset associated gene signatures from normal bone marrow – A proof of concept study
Source: PubMed Central journal article supplement (PMC5841735; doi:10.1371/journal.pone.0193249), 2018-03-07
Supplement: pone.0193249.s004.pdf [file pone.0193249.s004.pdf]

**S3 Table.** Characteristics of the CLL Cohorts included in the study.

| Cohort   | n <sup>a</sup> | GSE nr.   | Array type                               | Organization                                                   | Age         | Gender | Binet Stage      | ZAP-70                                               | Cytogenetic Status                                    | IgVH                   | TTT | Treatment Status                | Sample purified before hybridization |
|----------|----------------|-----------|------------------------------------------|----------------------------------------------------------------|-------------|--------|------------------|------------------------------------------------------|-------------------------------------------------------|------------------------|-----|---------------------------------|--------------------------------------|
| DUKE     | 68             | GSE 10138 | Human Genome U133 plus2                  | Duke University Medical Center                                 | NA          | NA     | NA               | ZAP-70 <sup>+</sup> : 40<br>ZAP-70 <sup>-</sup> : 16 | No marker/Del13q: 27<br>Tri12/Del11q: 7<br>Del17p: 2  | mIgVH: 35<br>uIgVH: 26 | NA  | Untreated                       | Yes                                  |
| IDFCI    | 124            | GSE 69034 | Human Genome U133 plus2                  | Dana Farber Cancer Institute                                   | NA          | M: 72  | NA               | ZAP-70 <sup>+</sup> : 42<br>ZAP-70 <sup>-</sup> : 63 | NA                                                    | mIgVH: 80<br>uIgVH: 40 | NA  | Untreated                       | Yes                                  |
| IIDFCI   | 83             | GSE 50006 | Human Genome U133 plus2                  | Dana Farber Cancer Institute                                   | NA          | M: 47  | NA               | ZAP-70 <sup>+</sup> : 27<br>ZAP-70 <sup>-</sup> : 52 | No marker/Del13q: 49<br>Tri12/Del11q: 17<br>Del17p: 6 | mIgVH: 44<br>uIgVH: 37 | +   | Untreated                       | Yes                                  |
| MUNICH   | 127            | GSE 22762 | Human Genome U133plus2, U133a, and U133b | University Hospital Grosshadern, Ludwig Maximilians-University | 62(30-79)   | M: 75  | A: 56<br>B-C: 33 | NA                                                   | No marker/Del13q: 89<br>Tri12/Del11q: 29<br>Del17p: 8 | mIgVH: 61<br>uIgVH: 66 | +   | Untreated                       | PBMC                                 |
| PADOVA   | 112            | GSE 28654 | Human Genome U133 plus2                  | University of Padova                                           | 60(37-77)   | M: 66  | NA               | ZAP-70 <sup>+</sup> : 28<br>ZAP-70 <sup>-</sup> : 61 | NA                                                    | mIgVH: 61<br>uIgVH: 28 | NA  | Untreated for at least 6 months | Yes                                  |
| ROCHE    | 318            | GSE 13204 | Human Genome U133 plus2                  | Roche Molecular Systems                                        | NA          | NA     | NA               | NA                                                   | NA                                                    | NA                     | NA  | Untreated                       | Yes                                  |
| SAPIENZA | 62             | GSE 35935 | Human Genome U133 plus2                  | Sapienza University                                            | 69.5(61-84) | M: 45  | NA               | NA                                                   | NA                                                    | NA                     | NA  | Untreated                       | Leukemic peripheral blood            |
| UCSD     | 130            | GSE 39671 | Human Genome U133 plus2                  | University of California, San Diego                            | NA          | NA     | NA               | NA                                                   | NA                                                    | NA                     | +   | Untreated                       | Yes                                  |

<sup>a</sup> The patient numbers indicate available, untreated CLL patients, not included in other cohorts. Summary characteristics are shown for cohorts with available data. Age is given as median age in years. NA = not available. Data sets can be accessed online at the Gene Expression Omnibus (<http://www.ncbi.nlm.nih.gov/geo/>) using the GSE number.
