# Supplementary material for: Subtype assignment of CLL based on B-cell subset associated gene signatures from normal bone marrow – A proof of concept study
Source: PubMed Central journal article supplement (PMC5841735; doi:10.1371/journal.pone.0193249), 2018-03-07
Supplement: pone.0193249.s006.pdf [file pone.0193249.s006.pdf]

**S5 Table.** BAGS classifier genes

| ENSEMBL Gene ID <sup>a</sup> | HGNC Symbol | BAGS Subtypes |              |              |              |              |              |
|------------------------------|-------------|---------------|--------------|--------------|--------------|--------------|--------------|
|                              |             | Pre-BI        | Pre-BII      | Immature     | Naïve        | Memory       | Plasma cell  |
| ENSG00000004468              | CD38        | 0             | 0            | 0,055148822  | 0            | -0,195897288 | 0            |
| ENSG00000005187              | ACSM3       | -0,079835662  | 0,383419171  | 0            | 0            | 0            | 0            |
| ENSG00000007062              | PROM1       | 0,006368928   | 0            | 0            | 0            | 0            | 0            |
| ENSG00000012124              | CD22        | 0             | 0            | 0            | 0            | 0            | -0,009728154 |
| ENSG00000023445              | BIRC3       | -0,095499243  | 0            | 0            | 0            | 0            | 0            |
| ENSG00000026751              | SLAMF7      | 0             | 0            | 0            | 0            | 0            | 0,081333674  |
| ENSG00000042980              | ADAM28      | 0             | -0,120277562 | 0            | 0,12739731   | 0            | 0            |
| ENSG00000048462              | TNFRSF17    | -0,174281415  | 0,135951007  | -0,163019931 | 0            | 0            | 0,121841186  |
| ENSG00000051108              | HERPUD1     | 0             | 0            | 0            | 0            | 0            | 0,016813158  |
| ENSG00000051180              | RAD51       | 0             | 0,015917164  | 0            | 0            | 0            | 0            |
| ENSG00000057657              | PRDM1       | 0             | 0            | 0            | 0            | 0            | 0,066261657  |
| ENSG00000060138              | YBX3        | 0             | 0            | 0            | 0            | -0,03089936  | 0            |
| ENSG00000070540              | WIP1        | 0             | 0            | 0            | 0            | 0            | 0,036604349  |
| ENSG00000071537              | SEL1L       | 0             | 0            | 0            | 0            | 0            | 0,057865137  |
| ENSG00000071575              | TRIB2       | 0             | 0            | 0,006207067  | 0            | 0            | 0            |
| ENSG00000075420              | FNDC3B      | 0             | 0            | 0            | 0            | 0            | 0,051806894  |
| ENSG00000076003              | MCM6        | 0             | 0            | -0,014482045 | 0            | 0            | 0            |
| ENSG00000077238              | IL4R        | 0             | 0            | 0            | 0,435041027  | -0,186048666 | 0            |
| ENSG00000077943              | ITGA8       | 0             | 0            | 0            | 0            | 0            | 0,07554695   |
| ENSG00000078589              | P2RY10      | -0,007941132  | 0            | 0            | 0            | 0            | 0            |
| ENSG00000079263              | SP140       | 0             | -0,065700556 | 0,059031616  | 0            | 0            | 0            |
| ENSG00000082293              | COL19A1     | 0             | 0            | 0            | 0,047623575  | 0            | 0            |
| ENSG00000086967              | MYBPC2      | 0             | 0            | 0,030470208  | 0            | 0            | 0            |
| ENSG00000087086              | FTL         | 0             | -0,001774317 | 0            | 0            | 0            | 0            |
| ENSG00000090376              | IRAK3       | 0             | 0            | 0            | 0,025492407  | 0            | 0            |
| ENSG00000091409              | ITGA6       | 0             | 0            | 0            | 0            | 0            | 0,085961417  |
| ENSG00000091972              | CD200       | 0             | 0            | 0            | 0,219445183  | -0,053181588 | 0            |
| ENSG00000092853              | CLSPN       | 0             | 0,059381831  | 0            | 0            | 0            | 0            |
| ENSG00000093009              | CDC45       | 0             | 0,021236058  | 0            | 0            | 0            | 0            |
| ENSG00000094804              | CDC6        | 0             | 9,43522E-06  | 0            | 0            | 0            | 0            |
| ENSG00000095015              | MAP3K1      | -0,037929964  | 0            | 0            | 0            | 0            | 0            |
| ENSG00000096006              | CRISP3      | 0             | 0            | 0            | 0            | 0,007467653  | 0            |
| ENSG00000096696              | DSP         | 0             | 0            | 0            | 0,008633427  | 0            | 0            |
| ENSG00000100219              | XBP1        | 0             | 0            | 0            | 0            | 0            | 0,022246552  |
| ENSG00000100721              | TCL1A       | -0,252421595  | 0,215064951  | 0,068462648  | 0,254363422  | -0,342169495 | 0            |
| ENSG00000101336              | HCK         | 0             | 0            | 0,050612299  | -0,011804743 | 0            | 0            |
| ENSG00000102218              | RP2         | 0             | 0            | 0            | -3,26893E-05 | 0            | 0            |
| ENSG00000102445              | KIAA0226L   | 0             | 0            | 0            | 0            | 0            | -0,06030621  |
| ENSG00000102580              | DNAJC3      | 0             | 0            | 0            | 0            | 0            | 0,048508443  |
| ENSG00000103528              | SYT17       | 0             | 0            | 0            | 0,291140971  | 0            | 0            |
| ENSG00000104432              | IL7         | 0             | 0            | 0            | 0            | 0,15202983   | 0            |
| ENSG00000104921              | FCER2       | 0             | 0            | 0            | 0,081703434  | 0            | 0            |
| ENSG00000105694              | TCEB1P28    | 0             | 0            | 0            | 0,015525288  | 0            | 0            |
| ENSG00000105854              | PON2        | 0             | 0            | 0,008386052  | 0            | 0            | 0            |
| ENSG00000105889              | STEAP1B     | 0             | 0            | 0            | 0,059666484  | 0            | 0            |
| ENSG00000105967              | TFEC        | 0             | 0            | 0            | -0,026270125 | 0,272774074  | 0            |
| ENSG00000106624              | AEBP1       | 0             | 0            | 0,008085875  | 0            | 0            | 0            |
| ENSG00000107447              | DNTT        | 0,238519145   | 0            | 0            | 0            | 0            | 0            |
| ENSG00000109674              | NEIL3       | 0             | 0,004239307  | 0            | 0            | 0            | 0            |
| ENSG00000109787              | KLF3        | 0             | 0            | 0            | 0,001043312  | 0            | 0            |

|                 |          |              |              |              |              |              |              |
|-----------------|----------|--------------|--------------|--------------|--------------|--------------|--------------|
| ENSG00000109805 | NCAPG    | 0            | 0,01656183   | -0,032895735 | 0            | 0            | 0            |
| ENSG00000110077 | MS4A6A   | 0            | 0            | 0,208106157  | 0            | 0            | 0            |
| ENSG00000111913 | FAM65B   | 0            | 0            | 0            | 0            | 0,030021104  | -0,009183778 |
| ENSG00000112290 | WASF1    | 0            | 0,211256246  | 0,163415154  | -0,108316254 | 0            | 0            |
| ENSG00000113615 | SEC24A   | 0            | 0            | 0            | 0            | 0            | 0,025387114  |
| ENSG00000114346 | ECT2     | 0            | 0,002962178  | 0            | 0            | 0            | 0            |
| ENSG00000114948 | ADAM23   | -0,045871791 | 0,136902635  | 0,271397044  | -0,112268779 | 0            | 0            |
| ENSG00000115956 | PLEK     | 0            | 0            | 0            | 0,046113831  | 0            | 0            |
| ENSG00000115993 | TRAK2    | 0            | 0            | 0            | 0,068802022  | 0            | 0            |
| ENSG00000116748 | AMPD1    | 0            | 0            | 0            | 0            | 0            | 0,215735065  |
| ENSG00000116815 | CD58     | 0            | 0            | -0,032324773 | 0            | 0            | 0            |
| ENSG00000117090 | SLAMF1   | 0            | 0            | 0            | 0            | -0,013233152 | 0            |
| ENSG00000118113 | MMP8     | 0            | 0            | 0            | 0            | 0,08597789   | 0            |
| ENSG00000118193 | KIF14    | 0            | 0,002393982  | 0            | 0            | 0            | 0            |
| ENSG00000118985 | ELL2     | 0            | 0            | 0            | 0            | 0            | 0,032305437  |
| ENSG00000119782 | FKBP1B   | 0            | 0            | 0            | 0            | 0,057395872  | 0            |
| ENSG00000120049 | KCNIP2   | 0            | 0            | 0            | 0,095575932  | 0            | 0            |
| ENSG00000121152 | NCAPH    | 0            | 0,02045612   | 0            | 0            | 0            | 0            |
| ENSG00000121807 | CCR2     | 0            | 0            | 0            | 0            | 0            | 0,021441048  |
| ENSG00000121895 | TMEM156  | 0            | -0,043472633 | 0            | 0            | 0            | 0            |
| ENSG00000122025 | FLT3     | 0,104734484  | 0            | 0            | 0            | 0            | 0            |
| ENSG00000122862 | SRGN     | 0            | 0            | 0,003228003  | -0,043881598 | 0            | 0            |
| ENSG00000123352 | SPATS2   | 0            | 0            | 0            | 0            | 0            | 0,011213308  |
| ENSG00000123975 | CKS2     | 0            | 0,039191105  | 0,0735212    | -0,32861928  | 0            | 0            |
| ENSG00000124942 | AHNAK    | 0            | -0,064162651 | 0            | 0            | 0,030115394  | 0            |
| ENSG00000126353 | CCR7     | 0            | 0            | 0            | 0,184076656  | 0            | 0            |
| ENSG00000128641 | MYO1B    | 0            | 0            | 0            | 0,000895254  | 0            | 0            |
| ENSG00000128833 | MYO5C    | 0,124529232  | 0            | 0            | 0            | 0            | 0            |
| ENSG00000129173 | E2F8     | 0            | 0,117496115  | 0            | 0            | 0            | 0            |
| ENSG00000129824 | RPS4Y1   | 0            | 0            | 0            | 0,050504228  | 0            | 0            |
| ENSG00000131002 | TXLNGY   | 0            | -0,012078363 | 0            | 0            | 0            | 0            |
| ENSG00000131724 | IL13RA1  | 0            | 0            | 0            | 0,14567796   | 0            | 0            |
| ENSG00000131781 | FMOS     | 0            | 0            | 0            | 0,016333712  | 0            | 0            |
| ENSG00000132274 | TRIM22   | 0            | 0            | 0            | 0            | 0            | -0,015002068 |
| ENSG00000133119 | RFC3     | 0            | 0,004903487  | 0            | 0            | 0            | 0            |
| ENSG00000133935 | C14orf1  | 0            | 0            | -0,034070368 | 0            | 0            | 0            |
| ENSG00000134061 | CD180    | -0,121919412 | 0            | 0            | 0            | 0            | 0            |
| ENSG00000134460 | IL2RA    | 0            | 0            | 0            | 0            | 0,146896989  | 0            |
| ENSG00000135048 | TMEM2    | 0            | 0            | 0            | 0,0168304    | 0            | 0            |
| ENSG00000135116 | HRK      | 0            | 0            | 0,062288047  | 0            | 0            | 0            |
| ENSG00000135318 | NTSE     | 0            | 0            | 0            | 0,145090155  | 0            | 0            |
| ENSG00000136982 | DSCC1    | 0            | 0,000790732  | 0            | 0            | 0            | 0            |
| ENSG00000137101 | CD72     | 0            | 0            | 0            | 0            | 0            | -0,010197401 |
| ENSG00000137265 | IRF4     | -0,037015874 | 0,114326553  | 0            | 0            | 0            | 0            |
| ENSG00000138180 | CEP55    | 0            | 0,00775363   | 0            | 0            | 0            | 0            |
| ENSG00000138587 | MNS1     | 0            | 0,099680726  | 0            | 0            | 0            | 0            |
| ENSG00000138639 | ARHGAP24 | 0            | 0            | 0            | 0            | 0,084370548  | 0            |
| ENSG00000138778 | CENPE    | 0            | 0,028131749  | 0            | 0            | 0            | 0            |
| ENSG00000141293 | SKAP1    | 0            | 0            | 0            | 0,082320327  | 0            | 0            |
| ENSG00000142731 | PLK4     | 0            | 0,021804705  | 0            | 0            | 0            | 0            |
| ENSG00000143476 | DTL      | 0            | 0,059506275  | 0            | 0            | 0            | 0            |
| ENSG00000143756 | FBXO28   | 0            | 0            | 0            | 0,051248175  | 0            | 0            |
| ENSG00000145386 | CCNA2    | 0            | 0,00227826   | 0            | 0            | 0            | 0            |
| ENSG00000147168 | IL2RG    | 0            | -0,092324224 | 0            | 0            | 0            | 0            |
| ENSG00000149054 | ZNF215   | 0            | 0            | 0            | 0            | 0            | 0,050655318  |

|                 |          |              |              |              |              |              |              |
|-----------------|----------|--------------|--------------|--------------|--------------|--------------|--------------|
| ENSG00000149177 | PTPRJ    | 0            | 0            | 0,13923948   | 0            | 0            | 0            |
| ENSG00000152253 | SPC25    | 0            | 0,096086846  | 0            | 0            | 0            | 0            |
| ENSG00000152256 | PDK1     | 0            | 0            | 0            | 0            | 0            | 0,051758699  |
| ENSG00000152689 | RASGRP3  | 0            | 0            | 0            | 0,066087802  | 0            | 0            |
| ENSG00000152785 | BMP3     | 0            | 0            | 0,210912983  | -0,021609218 | 0            | 0            |
| ENSG00000153064 | BANK1    | 0            | 0            | 0            | 0            | 0,053426533  | 0            |
| ENSG00000153253 | SCN3A    | 0            | 0            | 0            | 0,013136137  | 0            | 0            |
| ENSG00000156136 | DCK      | 0            | 0            | 0            | 0            | 0            | -0,096811026 |
| ENSG00000156738 | MS4A1    | -0,09674709  | -0,035599607 | 0,203383245  | 0            | 0,183879563  | -0,125120737 |
| ENSG00000157554 | ERG      | 0,080812772  | 0            | 0            | 0            | 0            | 0            |
| ENSG00000158164 | TMSB15A  | 0            | 0,161372502  | 0            | 0            | 0            | 0            |
| ENSG00000158481 | CD1C     | 0            | 0            | 0            | 0            | 0,220838254  | 0            |
| ENSG00000160683 | CXCR5    | 0            | 0            | 0            | 0,024110902  | 0            | 0            |
| ENSG00000161405 | IKZF3    | -0,31501003  | 0,005680736  | 0            | 0            | 0            | 0            |
| ENSG00000162188 | GNG3     | 0            | -0,019196563 | 0,233395141  | 0            | 0            | 0            |
| ENSG00000162692 | VCAM1    | 0,00650845   | 0            | 0            | 0            | 0            | 0            |
| ENSG00000162924 | REL      | 0            | 0            | 0            | 0            | 0            | -0,052314869 |
| ENSG00000163106 | HPGDS    | 0,033544742  | 0            | 0            | 0            | 0            | 0            |
| ENSG00000163563 | MNDA     | 0            | 0            | 0            | 0            | 0,040735911  | 0            |
| ENSG00000163564 | PYHIN1   | 0            | 0            | 0            | 0            | 0,0098032    | 0            |
| ENSG00000163568 | AIM2     | 0            | 0            | -0,028023942 | 0            | 0,441238531  | 0            |
| ENSG00000163808 | KIF15    | 0            | 0,022153672  | 0            | 0            | 0            | 0            |
| ENSG00000164543 | STK17A   | 0            | 0            | 0            | 0,01605094   | 0            | 0            |
| ENSG00000164821 | DEFA4    | 0            | 0            | 0,062887765  | 0            | 0            | 0            |
| ENSG00000166086 | JAM3     | 0            | 0            | 0            | 0            | 0,007661801  | 0            |
| ENSG00000168078 | PBK      | 0            | 0,004008476  | 0            | 0            | 0            | 0            |
| ENSG00000169397 | RNASE3   | -0,044264185 | 0            | -0,022762663 | 0            | 0            | 0            |
| ENSG00000169413 | RNASE6   | 0            | -0,173432968 | 0,089903968  | 0            | 0            | 0            |
| ENSG00000169508 | GPR183   | 0            | 0            | 0            | 0            | 0,207631154  | 0            |
| ENSG00000169575 | VPREB1   | 0            | 0,005245374  | 0            | -0,02397329  | 0            | 0            |
| ENSG00000171848 | RRM2     | 0            | 0,11862101   | 0            | 0            | 0            | 0            |
| ENSG00000173141 | MRPL57   | 0            | 0            | -0,01772027  | 0            | 0            | 0            |
| ENSG00000173208 | ABCD2    | 0            | 0            | 0            | -0,055545843 | 0            | 0            |
| ENSG00000173559 | NABP1    | 0            | 0            | 0            | 0            | 0,017519542  | 0            |
| ENSG00000174059 | CD34     | 0,176848326  | -0,053565491 | 0            | 0            | 0            | 0            |
| ENSG00000174371 | EXO1     | 0            | 0,042747304  | 0            | 0            | 0            | 0            |
| ENSG00000174944 | P2RY14   | 0            | 0            | 0            | 0,31531888   | -0,213049831 | 0            |
| ENSG00000177575 | CD163    | 0,013386319  | 0            | 0            | 0            | 0            | 0            |
| ENSG00000179344 | HLA-DQB1 | -0,0157371   | 0            | 0            | 0            | 0            | 0            |
| ENSG00000181631 | P2RY13   | 0            | 0            | 0            | 0            | 0,02862413   | 0            |
| ENSG00000181690 | PLAG1    | 0            | 0            | -0,019735914 | 0            | 0            | 0            |
| ENSG00000184226 | PCDH9    | 0            | 0,007525214  | 0,199798101  | 0            | 0            | 0            |
| ENSG00000184566 |          | 0            | 0            | 0            | -0,017447206 | 0            | 0            |
| ENSG00000188404 | SELL     | 0            | 0            | 0            | 0,010491759  | 0            | 0            |
| ENSG00000196368 | NUDT11   | 0,041081648  | 0            | 0            | 0            | 0            | 0            |
| ENSG00000196549 | MME      | 0            | 0            | 0            | -0,022613468 | 0            | 0            |
| ENSG00000196584 | XRCC2    | 0            | 0,025030886  | 0            | 0            | 0            | 0            |
| ENSG00000197429 | IPP      | -0,012224959 | 0            | 0            | 0            | 0            | 0            |
| ENSG00000197879 | MYO1C    | 0            | 0            | 0,030171869  | 0            | 0            | 0            |
| ENSG00000198692 | EIF1AY   | 0            | 0            | -0,04238152  | 0,151798094  | 0            | 0            |
| ENSG00000198825 | INPP5F   | 0            | 0            | -0,045977305 | 0,045464168  | 0            | 0            |
| ENSG00000204287 | HLA-DRA  | 0            | 0            | 0            | 0            | 0,01761542   | -0,240799272 |
| ENSG00000204389 | HSPA1A   | 0            | -0,083658749 | 0            | 0            | 0            | 0            |
| ENSG00000204852 | TCTN1    | 0            | 0            | 0            | 0,056953717  | 0            | 0            |
| ENSG00000211598 | IGKV4-1  | 0            | 0            | 0            | 0            | 0            | 0,051039937  |

|                 |             |              |             |              |              |   |              |
|-----------------|-------------|--------------|-------------|--------------|--------------|---|--------------|
| ENSG00000211640 | IGLV6-57    | 0            | 0           | 0            | 0            | 0 | 0,10268902   |
| ENSG00000211653 | IGLV1-40    | 0            | 0           | 0,034170107  | 0            | 0 | 0,072178525  |
| ENSG00000213005 | PTTG3P      | 0            | 0           | 0,071672376  | 0            | 0 | 0            |
| ENSG00000218690 | HIST1H2APS4 | 0            | 0,018873909 | 0            | 0            | 0 | 0            |
| ENSG00000220506 |             | 0            | 0           | -0,02943808  | 0,138309229  | 0 | 0            |
| ENSG00000220541 |             | 0            | 0           | 0,048105374  | -0,006145234 | 0 | 0            |
| ENSG00000227234 | SPANXB1     | 0,144284596  | 0           | 0            | 0            | 0 | 0            |
| ENSG00000231991 | ANXA2P2     | -0,017051882 | 0           | 0            | -0,072334697 | 0 | 0            |
| ENSG00000241106 | HLA-DOB     | -0,243722552 | 0           | 0            | 0            | 0 | 0            |
| ENSG00000242574 | HLA-DMB     | 0            | 0           | 0            | 0            | 0 | -0,146703441 |
| ENSG00000254087 | LYN         | -0,014003892 | 0           | 0            | 0            | 0 | 0            |
| ENSG00000261371 | PECAM1      | 0            | -0,14321088 | 0            | 0            | 0 | 0            |
| ENSG00000263639 | MSMB        | 0,042322611  | 0           | 0            | 0            | 0 | 0            |
| ENSG00000265241 | RBM8A       | 0            | 0           | 0,077893246  | 0            | 0 | 0            |
| ENSG00000269404 | SPIB        | -0,104827171 | 0           | 0,121865529  | 0            | 0 | 0            |
| ENSG00000273703 | HIST1H2BM   | 0            | 0,057518809 | 0            | 0            | 0 | 0            |
| ENSG00000275302 | CCL4        | 0            | 0           | 0,318426424  | 0            | 0 | 0            |
| ENSG00000277734 | TRAC        | 0            | 0           | 0,184305101  | 0            | 0 | 0            |
| ENSG00000277775 | HIST1H3F    | -0,063830715 | 0,253385852 | -0,021812031 | 0            | 0 | 0            |
| ENSG00000278272 | HIST1H3C    | 0            | 0,099113231 | 0            | 0            | 0 | 0            |
| ENSG00000278463 | HIST1H2AB   | 0            | 0,110638332 | 0            | 0            | 0 | 0            |
| ENSG00000278588 | HIST1H2BI   | 0            | 0,146629096 | -0,036035928 | 0,071288536  | 0 | 0            |
| ENSG00000278705 | HIST1H4B    | 0            | 0           | -0,062725095 | 0            | 0 | 0            |
| ENSG00000279530 |             | 0            | 0           | 0,02168593   | 0            | 0 | 0            |

<sup>a</sup>Ensembl gene id and corresponding HGNC symbols for classifier genes ( $n=184$ ), derived from sternal bone marrow B-cell data, are listed along with relative expression values for the respective classifier-specific subtype(s).
