# Supplementary material for: Subtype assignment of CLL based on B-cell subset associated gene signatures from normal bone marrow – A proof of concept study
Source: PubMed Central journal article supplement (PMC5841735; doi:10.1371/journal.pone.0193249), 2018-03-07

**S1 Fig. Time to first treatment in the Munich, UCSD, and IIDFCI cohorts.** Cumulative incidence curves show years elapsed from the time of diagnostic GEP until the commencement of initial treatment.

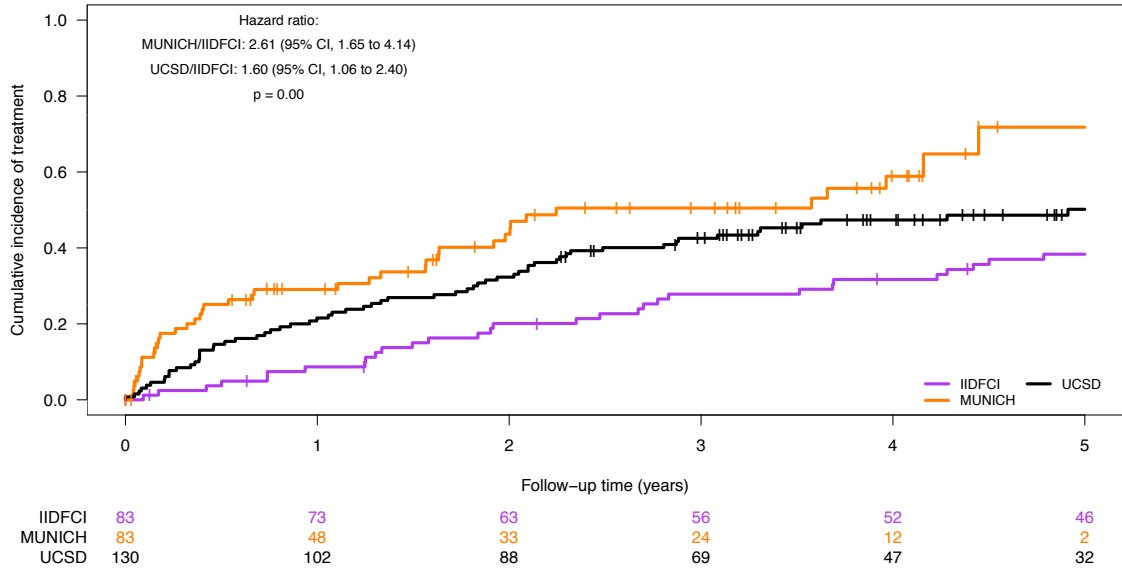

Supplement: pone.0193249.s008.pdf [file pone.0193249.s008.pdf]
