# Supplementary material for: Subtype assignment of CLL based on B-cell subset associated gene signatures from normal bone marrow – A proof of concept study
Source: PubMed Central journal article supplement (PMC5841735; doi:10.1371/journal.pone.0193249), 2018-03-07
Supplement: pone.0193249.s010.pdf [file pone.0193249.s010.pdf]

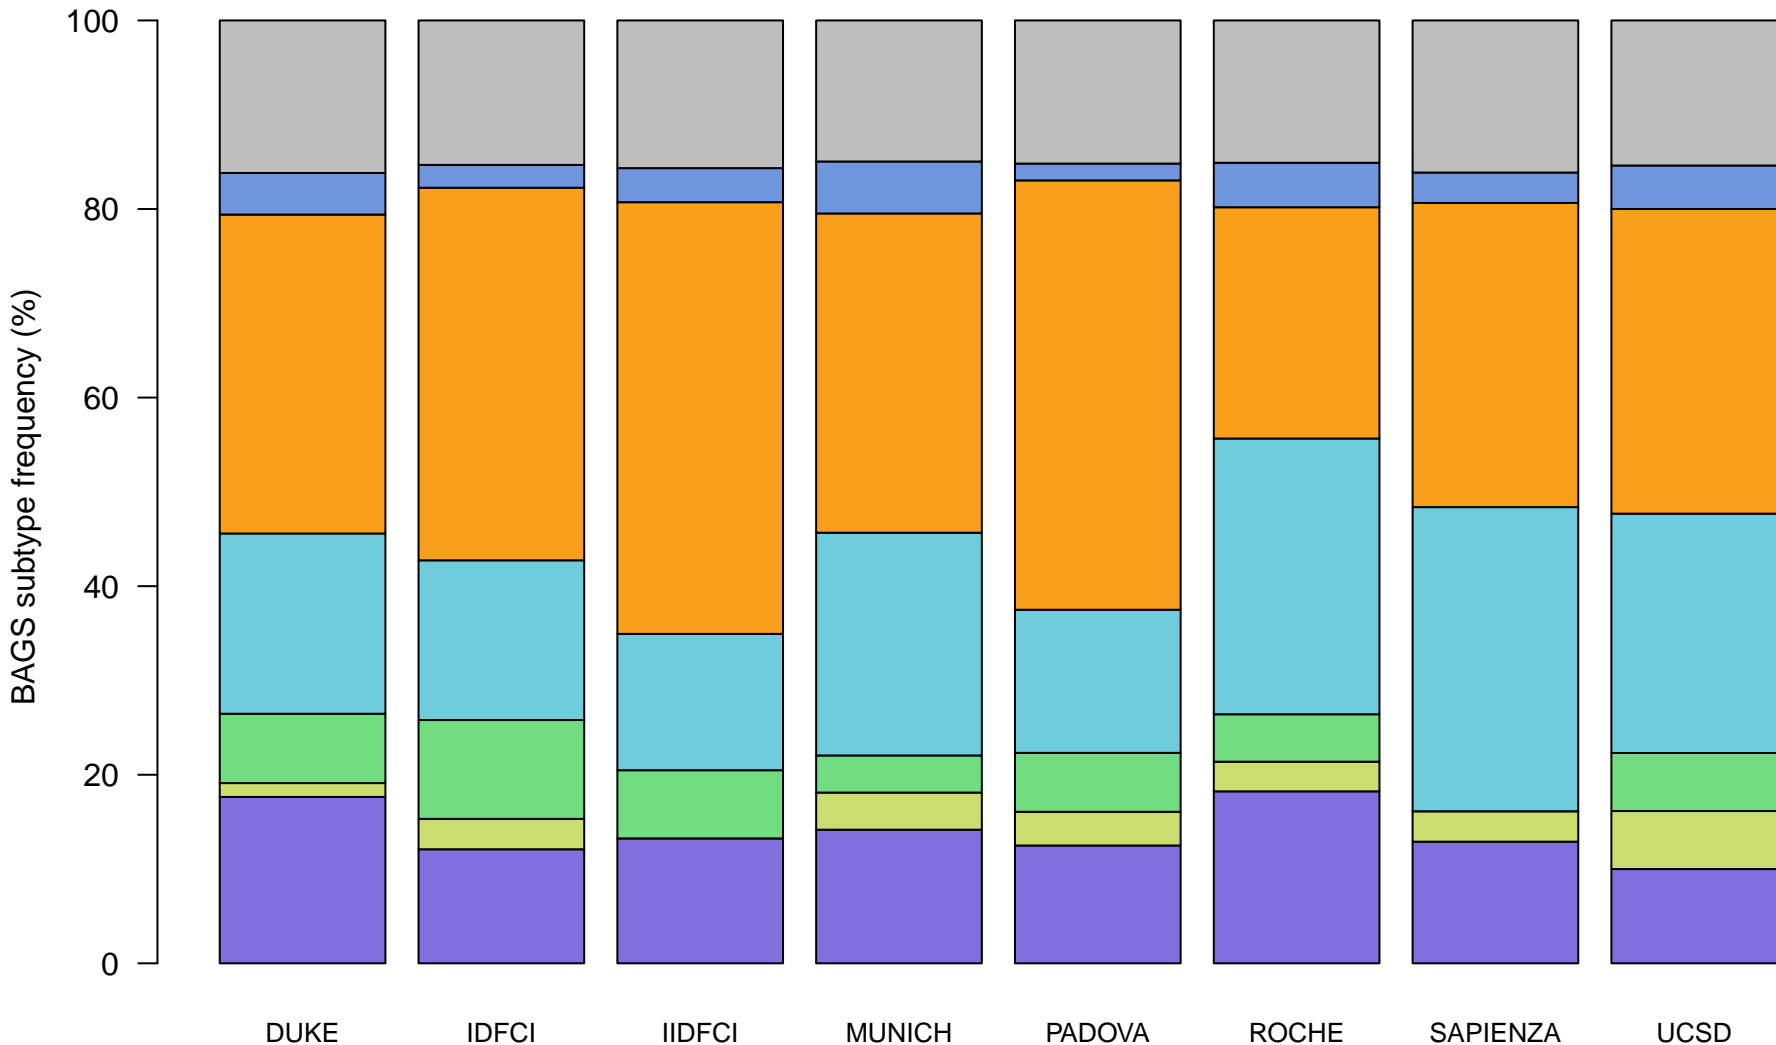

Pre-BI Pre-BII Immature Naive Memory Plasmacell Unclassified
