# Supplementary material for: Subtype assignment of CLL based on B-cell subset associated gene signatures from normal bone marrow – A proof of concept study
Source: PubMed Central journal article supplement (PMC5841735; doi:10.1371/journal.pone.0193249), 2018-03-07

**S5 Fig. Analyses of the prognostic impact of subtyping according to BAGS on TTT in watch-and-wait CLL.** The cumulative incidence of treatment. (a) All subtypes. (b) All subtypes divided as early (pre-), naïve, and late (post-germinal). Only data from the IIDFCI, and UCSD cohort were used (n = 180), as the Munich cohort was excluded.

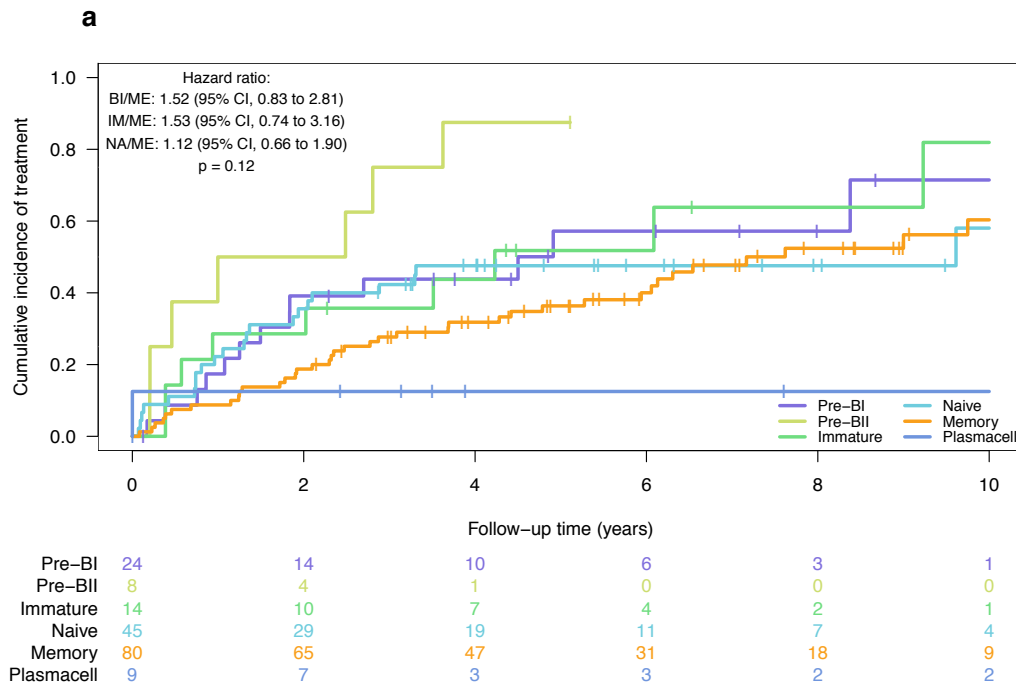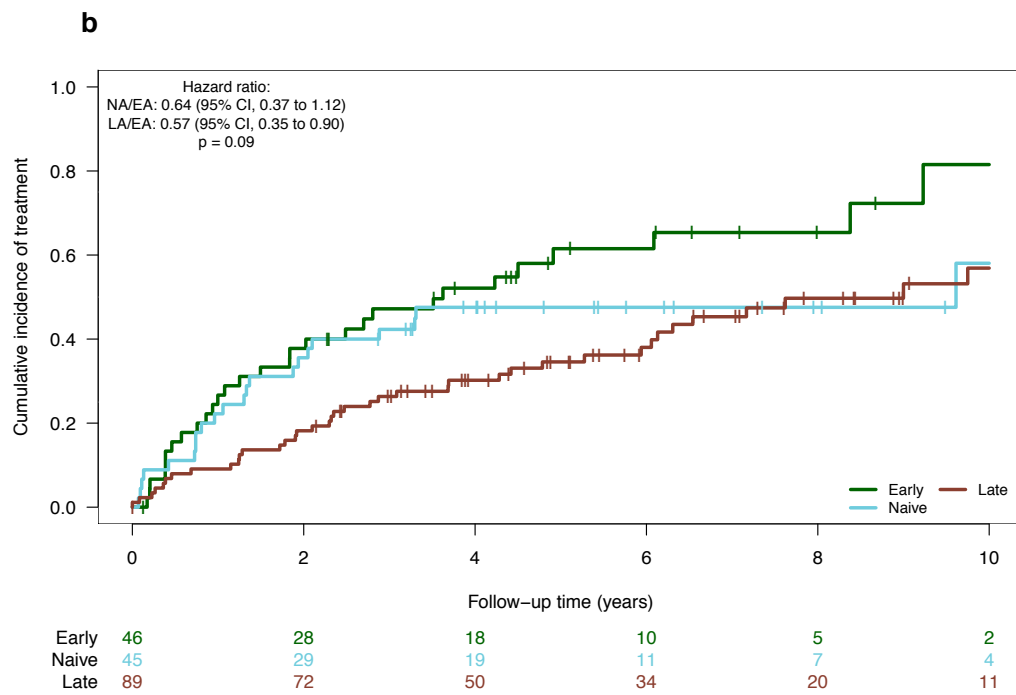

Supplement: pone.0193249.s012.pdf [file pone.0193249.s012.pdf]
